# Supplementary material
Source: Research Square preprint supplement (doi:10.21203/rs.3.rs-8832543/v1)
Supplement: Supplementary file 1 [file 79227ec0afe6184d27fbbc60.xlsx]

## Sheet: Sheet1
	NFM Group
	Case	Gender	Age	Precordial Discomfort	Fever	Adams-Stokes Attack	Nausea/ Vomiting	Abdominal Pain	Arrhythmia
	1	Male	1y11m	0	0	1	0	0	0
	2	Male	7y2m	0	0	0	0	0	0
	3	Female	11y11m	1	1	0	1	0	0
	4	Male	12y2m	1	0	0	0	0	1
	5	Male	13y7m	1	1	0	1	0	0
	6	Male	7y4m	1	0	0	0	0	0
	7	Male	13y10m	1	0	0	0	0	0
	8	Male	11y6m	1	1	0	0	0	0
	9	Female	27d	0	0	0	1	1	0
	10	Male	13y	1	0	0	0	0	0
	11	Male	4y10m	1	1	0	0	0	0
	12	Male	9y8m	1	1	0	0	0	0
	13	Male	11y9m	1	0	0	1	0	1
	14	Male	9y6m	1	0	0	0	0	0
	15	Male	12y	1	0	0	0	0	0
	16	Female	10y11m	1	0	0	0	0	0
	17	Female	4y8m	0	0	0	1	1	1
	18	Male	7y2m	1	0	0	0	0	0
	19	Male	12y	1	0	0	0	0	0
	20	Male	12y	1	0	0	1	1	1
	21	Female	2y4m	0	1	0	1	0	0
	22	Male	8y1m	1	1	0	0	0	0
	23	Male	6y11m	1	0	0	1	0	1
	24	Female	2m10d	0	0	0	0	0	1
	25	Female	8y10m	1	1	0	0	0	0
	26	Female	11y7m	1	1	0	1	0	0
	27	Male	13y	1	0	0	0	0	0
	28	Male	10y11m	1	1	0	0	0	0
	29	Female	9y6m	1	0	0	0	0	0
	30	Male	13y	1	0	1	0	0	0
	31	Male	14y	1	1	0	0	0	0
	32	Male	16y	0	0	0	0	0	0
	33	Male	9y2m	1	1	0	1	0	1
	34	Male	12y	1	0	0	0	0	0
	35	Male	6y8m	0	1	0	0	1	1
	36	Female	8y7m	1	1	0	1	0	0
	37	Female	4y3m	0	1	0	0	0	0
	38	Male	10y3m	0	0	0	0	1	0
	39	Female	2y7m	0	1	0	0	0	0
	40	Female	2y	0	0	0	0	0	1
	41	Male	3y1m	0	0	0	0	0	1
	42	Male	6y6m	0	1	0	1	1	0
	43	Male	4y7m	1	0	0	0	0	0
	44	Male	9m26d	0	1	0	0	0	0
	45	Female	11y5m	1	1	0	0	0	0
	46	Female	7y10m	0	1	0	1	1	1
	47	Female	6y3m	1	0	0	0	0	0
	48	Male	3y7m	1	1	0	0	0	0
	49	Male	10y7m	1	0	0	1	1	0
	FM Group
	Case	Gender	Age	Precordial Discomfort	Fever	Adams-Stokes Attack	Nausea/ Vomiting	Abdominal Pain	Arrhythmia
	1	Male	1m13d	0	0	1	0	0	1
	2	Male	8y8m	1	1	1	1	1	0
	3	Female	8y7m	0	0	0	0	1	1
	4	Female	9y	1	0	0	0	0	0
	5	Female	12y	1	0	0	0	0	0
	6	Female	8y	0	0	1	1	0	1
	7	Male	16y	1	0	0	1	0	0
	8	Female	9y3m	1	1	0	1	1	0
	9	Female	2y9m	0	1	1	0	0	1
	10	Male	9y3m	0	1	0	1	1	0
	11	Male	8y5m	0	0	0	0	0	0
	12	Female	7y3m	1	1	0	0	0	0
	13	Female	9y	1	1	0	0	0	1
	14	Female	5y5m	0	1	0	0	1	1
	15	Female	6y5m	0	1	1	0	0	1
	16	Male	12y	0	1	0	0	0	0
	17	Male	9y10m	1	1	1	1	0	1
	18	Male	6y	0	1	0	1	0	0
	19	Female	3y11m	0	0	0	0	0	0
	20	Female	3y8m	0	1	0	1	0	0
	21	Male	8.y1m	1	0	1	1	1	1
	22	Male	3y9m	1	0	0	0	0	0
	Binary Variables (0/1): 0 = No/Absent, 1 = Yes/Present.

## Sheet: Sheet2
	NFM Group
	Case	Gender	Age	WBC Count (×10⁹/L)	CRP (mg/L)	Hs-cTnI (µg/L)	CK-MB (U/L)	Creatinine (µmol/L)	Lymphocyte (×10⁹/L)	Albumin (g/L)	Hemoglobin (g/L)	Platelet (×10⁹/L)	HALP Score	LVEF (%)	Reduced Septal/Wall Motion	Pericardial Effusion	Mechanical Ventilation	Vasoactive Drug Use	PICU Admission	Survival Status (1=Alive to Discharge)
	1	Male	1y11m	3.85	100	0	235	55	1.39	45	108	257	26.29	65	0	0	0	0	0	1
	2	Male	7y2m	14.54	3.42	0.004	45	59	2.14	50.4	129	330	42.16	67	0	0	0	0	0	1
	3	Female	11y11m	5.57	27.15	0	41	82	1.59	39.9	129	215	38.06	69	0	0	0	0	0	1
	4	Male	12y2m	6.76	0.59	0.066	16	74	2.51	47.8	134	339	47.42	65	0	0	0	0	0	1
	5	Male	13y7m	7.74	27.3	28.318	83	92	2.44	41	125	249	50.22	60	0	0	0	0	0	1
	6	Male	7y4m	3.9	0.5	0.011	45	72	2.51	45.6	129	260	56.79	68	0	0	0	0	0	1
	7	Male	13y10m	10.9	7.34	4.42	53	50	2.05	41	132	206	53.86	68	0	0	0	0	0	1
	8	Male	11y6m	16.7	43	3.25	42.6	33	1.33	47.4	133	322	26.04	70	0	0	0	0	0	1
	9	Female	27d	11.7	2.77	0.05	34	44	7.1	38.7	145	424	93.97	37	1	1	0	0	0	1
	10	Male	13y	6.1	0.92	0.001	12	45	2.75	41.9	130	278	53.88	69	0	0	0	0	0	1
	11	Male	4y10m	2	0.05	0.001	178	44	2.22	46.1	118	555	21.76	69	0	0	0	0	0	1
	12	Male	9y8m	10.9	0.79	0.0312	45	44	4.08	47.4	139	355	75.72	71	0	0	0	0	0	1
	13	Male	11y9m	2.3	0.15	0.0111	379	40	1.32	39.7	137	178	40.33	74	0	0	0	0	0	1
	14	Male	9y6m	5.5	8.56	6.335	25	44	1.51	38.6	136	379	20.91	77	0	1	0	0	0	1
	15	Male	12y	10.3	69.48	40	158	56	2.67	36.7	135	246	53.78	59	0	0	0	0	0	1
	16	Female	10y11m	9.6	12.81	2.1812	38	42	3.08	45	124	256	67.13	68	0	0	0	0	0	1
	17	Female	4y8m	11.3	0.47	0.0231	61	29	2.13	43.9	125	250	46.75	41.5	1	0	0	0	0	1
	18	Male	7y2m	15.7	0.97	0.0447	16	34	1.84	45.7	130	196	55.78	65	0	0	0	0	0	1
	19	Male	12y	7.9	20.03	1.137	22	41	3.42	40.7	134	395	47.22	60	0	0	0	0	0	1
	20	Male	12y	8.9	2.38	0.022	42	44	1.08	46.4	144	281	25.86	68	0	0	0	0	0	1
	21	Female	2y4m	12.22	2	0.0504	25	13	5.54	46.3	169	358	114.4	45	1	1	0	0	0	1
	22	Male	8y1m	10.9	13.89	0.0508	33	30	4.34	46.8	115	287	81.39	65	0	0	0	0	0	1
	23	Male	6y11m	18.08	1.47	0.026	16	35	3.59	44.3	112	362	49.2	66	0	0	0	0	0	1
	24	Female	2m10d	10.4	0	0.0473	57	23	7.27	44.7	117	526	72.28	76	0	0	0	0	0	1
	25	Female	8y10m	14.74	7.74	7.407	64	24	3.27	44.6	128	361	51.7	66	0	0	0	0	0	1
	26	Female	11y7m	9.3	24.56	25	90	34	1.77	43.8	117	215	42.19	66	0	0	0	0	0	1
	27	Male	13y	8.6	9.28	0.0512	15	48	1.84	45.7	143	270	44.53	64	0	0	0	0	0	1
	28	Male	10y11m	2.7	5	0.00043	9	50	2.88	46.1	105	317	43.98	57	0	0	0	0	0	1
	29	Female	9y6m	6.9	13.75	0.9498	25	51	1.96	43.8	143	233	52.69	67	0	0	0	0	0	1
	30	Male	13y	9.6	1	8.665	39	55	2.75	44.2	130	253	65.46	76	0	0	0	0	0	1
	31	Male	14y	7.5	14.86	7.338	27	66	1	41.6	147	263	23.25	62	0	0	0	0	0	1
	32	Male	16y	8	0	0.306	11	74	1.55	45.9	160	210	54.21	53	1	0	0	0	0	1
	33	Male	9y2m	2.7	25.63	5.783	58	32	0.74	48.1	118	210	14.03	66	0	0	0	0	0	1
	34	Male	12y	8.1	0	0.006	23	45	2.07	37.8	134	340	30.84	63	0	0	0	0	1	1
	35	Male	6y8m	7.1	60.63	0.00002	15	31	1.89	39.3	104	278	27.79	60	0	0	0	0	1	1
	36	Female	8y7m	12.3	3.4	0.0015	21	25	1.53	44.5	92	383	16.35	66	0	0	0	1	1	1
	37	Female	4y3m	3	21.8	/	33	26	1.31	39.9	125	181	36.1	68	0	0	0	0	0	1
	38	Male	10y3m	10	1.48	0.001316	25	30	3.08	37.4	122	245	57.36	21	1	1	0	0	0	1
	39	Female	2y7m	6.75	1.02	0.001	15	35	3.58	40	112	230	69.73	63	0	0	0	0	0	1
	40	Female	2y	11.94	0.5	0.0006	29	34	6.33	39	118	445	65.46	65	0	0	0	0	0	1
	41	Male	3y1m	13.01	0.3	0.0005	20	37	6.99	39.6	142	548	71.73	70	0	0	0	0	0	1
	42	Male	6y6m	5.59	1.7	/	38	68	4.08	44	123	405	54.52	66	0	0	0	0	0	1
	43	Male	4y7m	10.39	0.53	0.00	27	71	3.99	49.7	116	259	88.82	71	0	0	0	0	0	1
	44	Male	9m26d	9.7	0.98	/	32	63	6.95	42	124	203	176	73	0	0	0	0	0	1
	45	Female	11y5m	13.72	13.76	0.0005	19	61	2.55	48.4	137	238	65.03	68	0	0	0	0	0	1
	46	Female	7y10m	9.8	11.17	/	22	64	2.22	42.8	132	349	35.94	68	0	0	0	0	0	1
	47	Female	6y3m	7	0.5	0.00003	21	56	3.03	40	125	245	61.84	69	0	0	0	0	0	1
	48	Male	3y7m	4.9	1.1	0.003	1.1	56	2.64	45	117	319	46.55	67	0	0	0	0	0	1
	49	Male	10y7m	9.17	69.57	0.0342	16	42	1.64	46.3	135	260	39.43	78	0	0	0	0	0	1
	FM Group
	Case	Gender	Age	WBC Count (×10⁹/L)	CRP (mg/L)	Hs-cTnI (µg/L)	CK-MB (U/L)	Creatinine (µmol/L)	Lymphocyte (×10⁹/L)	Albumin (g/L)	Hemoglobin (g/L)	Platelet (×10⁹/L)	HALP Score	LVEF (%)	Reduced Septal/Wall Motion	Pericardial Effusion	Mechanical Ventilation	Vasoactive Drug Use	PICU Admission	Survival Status (1=Alive to Discharge)
	1	Male	1m13d	8.9	0	185.7	65	43	2.34	34.7	91	246	30.04	56	0	0	0	1	1	1
	2	Male	8y8m	8.6	54.51	18.9	34	29	2.43	31.1	88	314	21.17	71	0	0	0	1	1	1
	3	Female	8y7m	17.2	6.98	17.67	68	44	1.95	30.6	129	285	27.01	47	1	1	1	1	1	1
	4	Female	9y	8.9	1.68	40	318	40	1.54	42.4	133	241	36.03	48	0	0	0	1	1	1
	5	Female	12y	15.8	5.87	15.34	81	47	1.51	36.4	148	304	26.76	27	1	1	1	1	1	1
	6	Female	8y	6.8	4.32	23.099	69	45	1.07	42.3	131	204	29.06	54	1	1	1	1	1	1
	7	Male	16y	8	0.53	50	60	92	1.55	45.9	160	210	54.2	55	0	0	0	1	1	1
	8	Female	9y3m	5.0	27.75	50	45	52	0.51	39	109	80	27.1	27	1	1	1	1	1	1
	9	Female	2y9m	8.4	2.95	16.419	50	53	1.71	36.9	114	321	22.41	68	0	0	0	1	1	1
	10	Male	9y3m	13.6	70.99	40	247	75	2.77	38.3	151	257	62.33	16	0	0	1	1	1	0
	11	Male	8y5m	6.0	0.33	4.9	36	35	2.01	40.5	122	385	25.8	44	1	0	1	1	1	1
	12	Female	7y3m	7.1	65.39	40	124	43	3.7	28.5	131	253	54.6	31	1	1	1	1	1	0
	13	Female	9y	26	45.91	40	125	49	1.16	45.3	131	334	20.61	33	1	0	1	1	1	0
	14	Female	5y5m	11.9	16.64	50	191	127	1.74	33.2	114	124	53.11	37	1	0	1	1	1	0
	15	Female	6y5m	17.8	27.98	2.81	62	47	1.14	34.1	114	290	15.28	77	0	0	0	1	1	1
	16	Male	12y	10.1	50.3	0.0203	104	91	1.75	28.7	141	145	48.84	58	0	0	0	1	1	1
	17	Male	9y10m	15.9	30.55	0.00641	33	48	1.69	43.8	130	371	25.94	52	0	0	0	1	1	1
	18	Male	6y	12.5	1.47	1.56	90	62	3.41	38.1	142	216	85.4	61	0	0	0	1	1	1
	19	Female	3y11m	10.6	0.25	0.00111	119	31	2.2	38.7	98	315	26.49	51	0	0	0	1	1	1
	20	Female	3y8m	9.2	0.5	0.35	30	24	2.15	34.5	107	168	47.24	29	1	1	0	1	1	1
	21	Male	8.y1m	17.1	115	95	42	57	0.46	46.1	116	234	10.51	44	0	0	1	1	1	1
	22	Male	3y9m	3.2	23.31	139.1	18	16	0.49	37	93	186	9.07	41	0	0	1	1	1	0
			Key:
			Hs-cTnI: High-sensitivity Troponin I
			CK-MB: Creatine Kinase-MB
			CRP: C-reactive Protein
			WBC: White Blood Cell
			LVEF: Left Ventricular Ejection Fraction
			HALP Score: Hemoglobin, Albumin, Lymphocyte, and Platelet Score (Calculated as [Hb (g/L) × Alb (g/L) × Lymphocyte (×10⁹/L)] / Platelet (×10⁹/L))
			Binary Variables (0/1): 0 = No/Absent, 1 = Yes/Present. For Survival Status, 1 = Alive to Discharge.
